# Supplementary material for: Theoretical insights into the possible applications of amidoxime-based adsorbents in neptunium and plutonium separation
Source: Royal Society of Chemistry journal article supplement (doi:10.1039/d1dt01900g), 2021-01-01
Supplement: d1dt01900g1.pdf [file d1dt01900g1.pdf]

## Supporting Information

### **Theoretical Insights on the Possible Applications of Amidoxime-Based Adsorbents in Neptunium and Plutonium Separation**

*Yan-Mei Chen,<sup>a</sup> Cong-Zhi Wang,<sup>\*b</sup> Qun-Yan Wu,<sup>b</sup> Jian-Hui Lan,<sup>b</sup> Zhi-Fang Chai,<sup>a,b</sup> and  
Wei-Qun Shi<sup>\*b</sup>*

<sup>a</sup>Engineering Laboratory of Advanced Energy Materials, Ningbo Institute of Industrial  
Technology, Chinese Academy of Sciences, Ningbo, Zhejiang, 315201, China

<sup>b</sup>Laboratory of Nuclear Energy Chemistry, Institute of High Energy Physics, Chinese  
Academy of Sciences, Beijing 100049, China

\*Email: shiwq@ihep.ac.cn; wangcongzhi@ihep.ac.cn

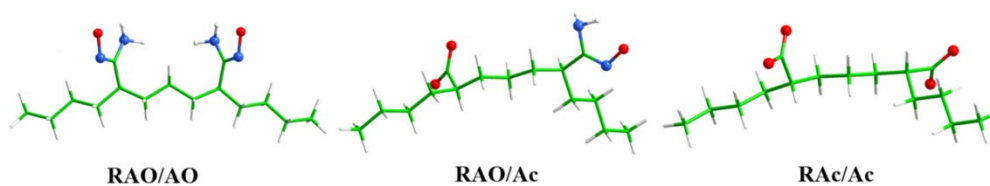

**Figure S1.** Optimized structures of the amidoxime/carboxyl-based adsorbents (R=C<sub>13</sub>H<sub>26</sub>). H, C, N, O atoms are represented by white, green, blue and red spheres, respectively. The subsequent figure adopt the same arrangement.

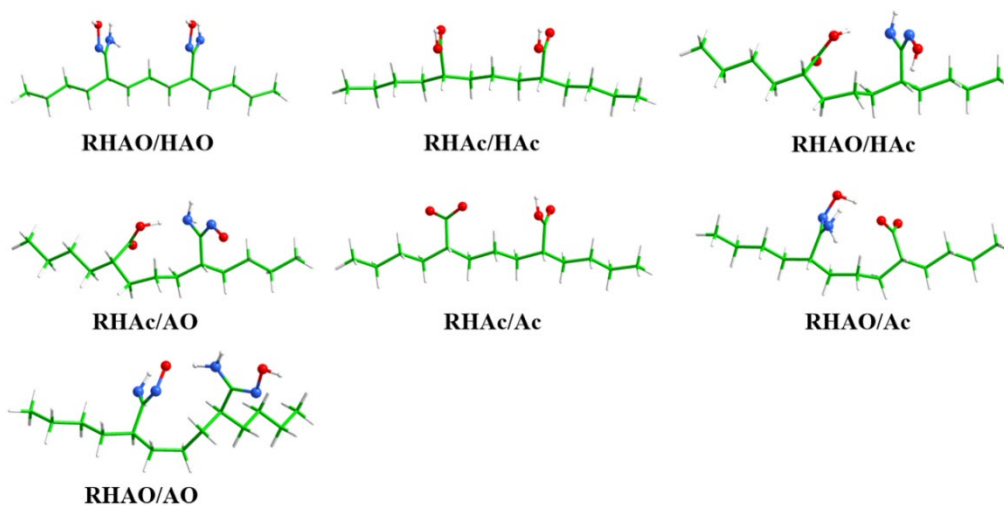

**Figure S2.** Optimized structures of the protonated amidoxime/carboxyl-based adsorbents.

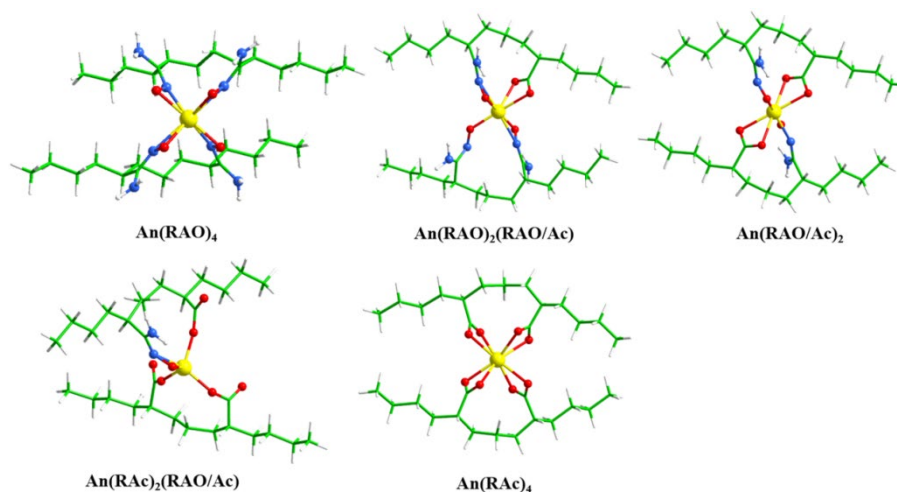

**Figure S3.** Optimized structures of the Np(IV) and Pu(IV) complexes with  $RAO^-$  and  $RAc^-$  by the B3LYP method. The H, C, N, O and actinide atoms are represented by white, green, blue, red and yellow spheres, respectively. The subsequent figures adopt the same arrangement.

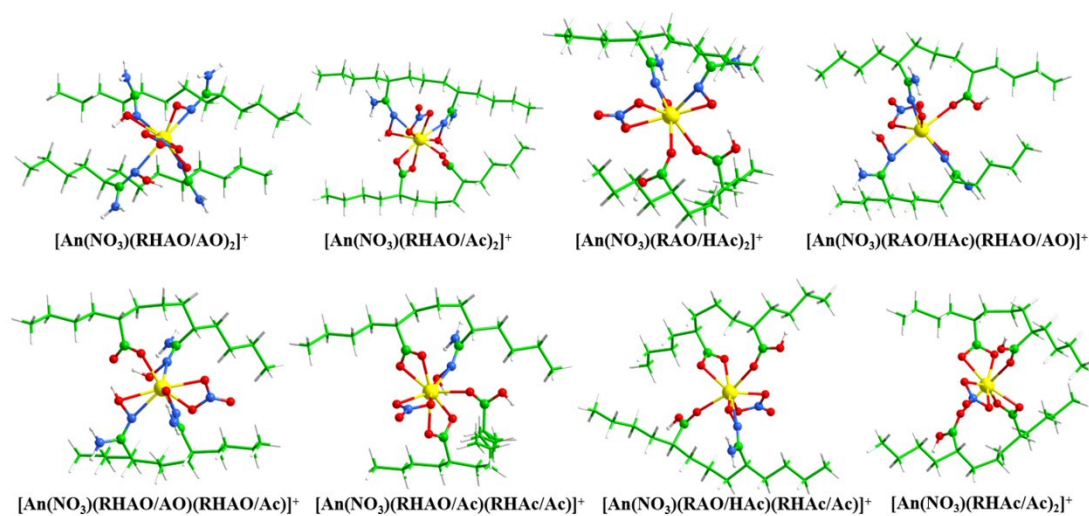

**Figure S4.** Optimized structures of the Np(IV) and Pu(IV) protonated complexes with  $RAO^-$ ,  $RAc^-$ , and  $NO_3^-$  by the B3LYP method.

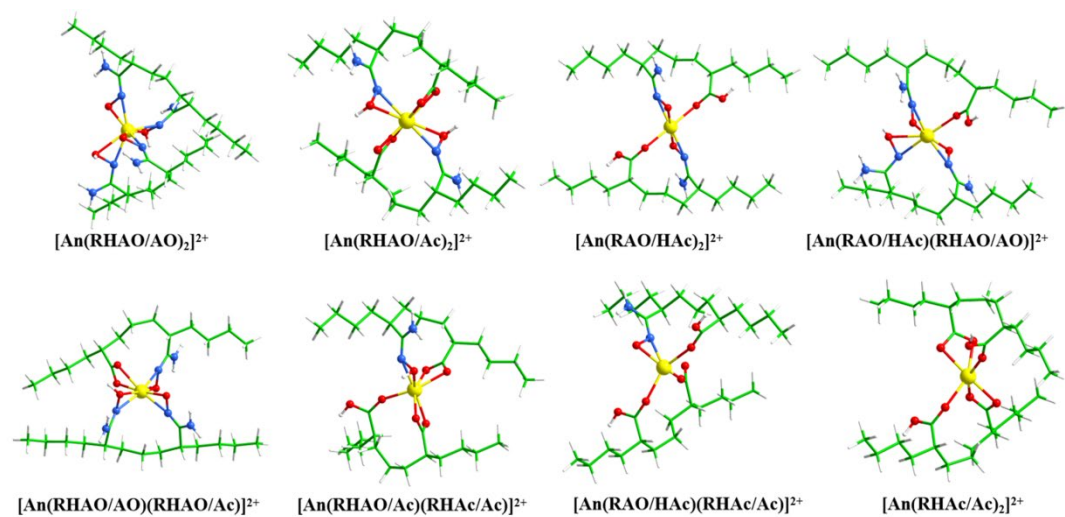

**Figure S5.** Optimized structures of the Np(IV) and Pu(IV) protonated complexes with  $\text{RAO}^-$  and  $\text{RAc}^-$  by the B3LYP method.

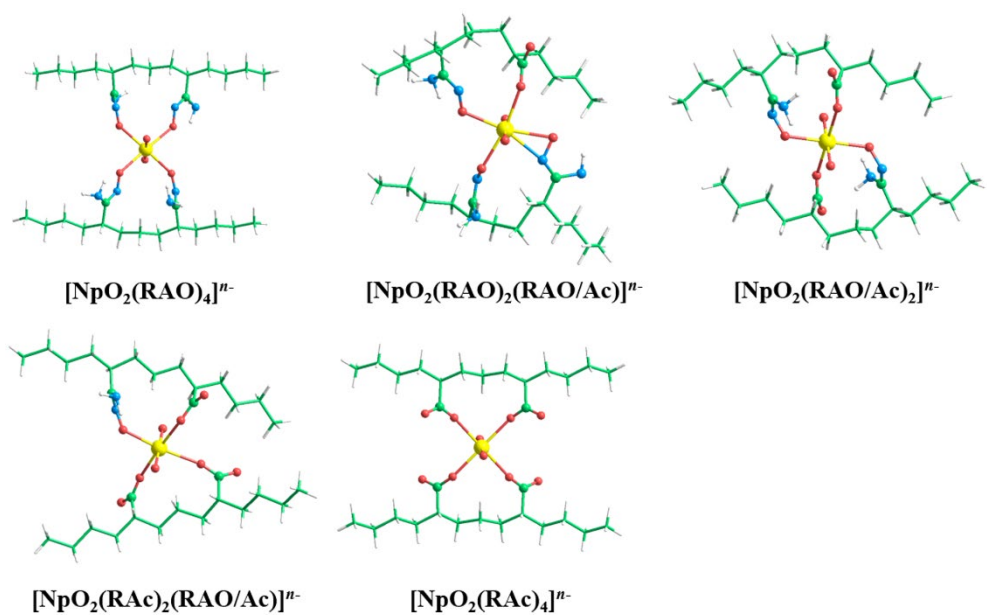

**Figure S6.** Optimized structures of Np(V, VI) complexes with  $\text{RAO}^-$  and  $\text{RAc}^-$  by the B3LYP method.

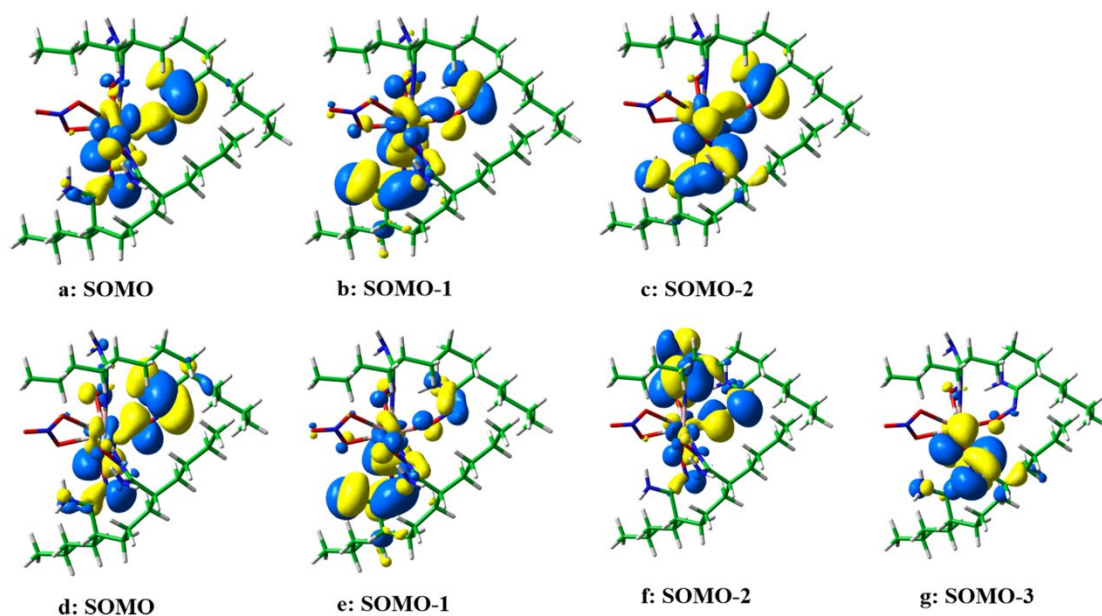

**Figure S7.** The  $\alpha$ -spin valence MOs diagrams of the  $[\text{An}(\text{NO}_3)(\text{RAO})_4]^-$  complexes (a-c: Np; d-g: Pu) at the B3LYP/6-311G(d, p)/RECP level of theory (the isosurface value is set as 0.02 a.u.).

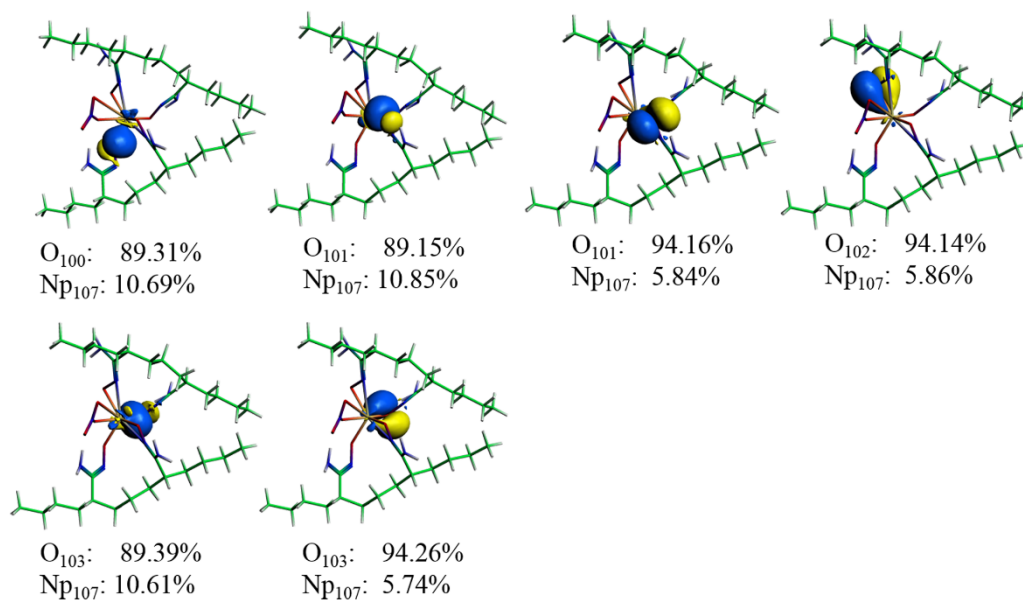

**Figure S8.** NBO  $\sigma$  and  $\pi$  orbitals of the Np-O bonds in  $[\text{Np}(\text{NO}_3)(\text{RAO})_4]^-$  calculated by the BP86 method.

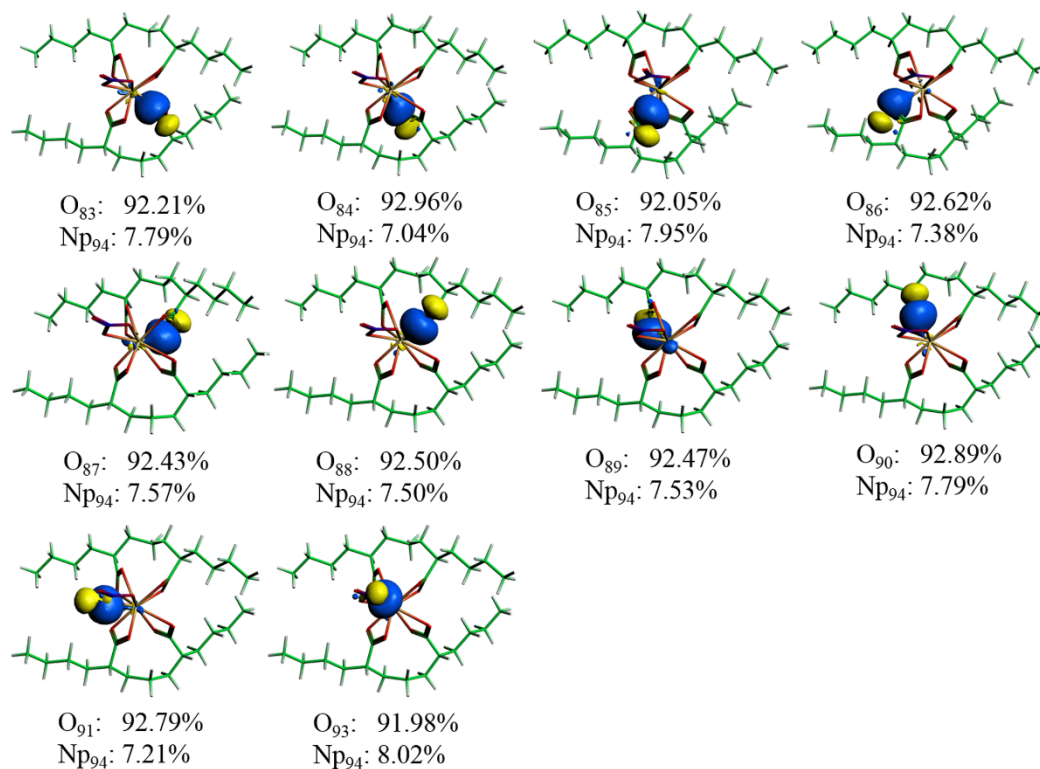

**Figure S9.** NBO  $\sigma$  orbitals of the Np-O bonds in  $[\text{Np}(\text{NO}_3)(\text{RAC})_4]^-$  calculated by the BP86 method.

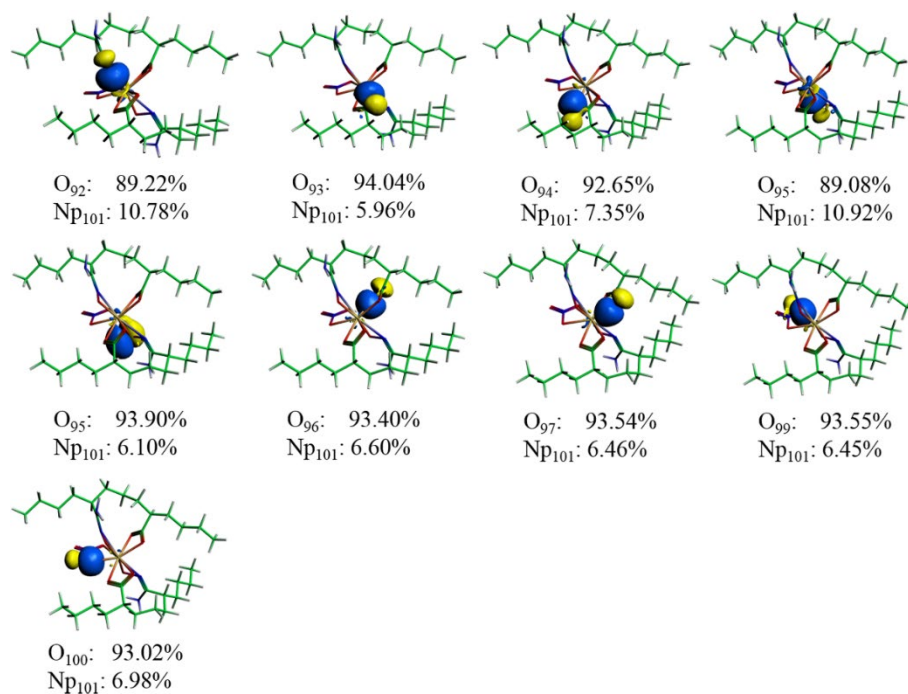

**Figure S10.** NBO  $\sigma$  and  $\pi$  orbitals of the Np-O bonds in  $[\text{Np}(\text{NO}_3)(\text{RAO/Ac})_2]^-$  calculated by the BP86 method.

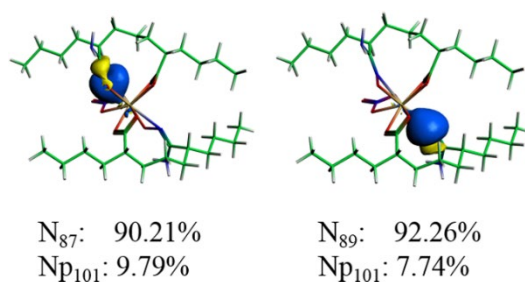

**Figure S11.** NBO  $\sigma$  orbitals of the Np-N bonds in  $[Np(NO_3)(RAO/Ac)_2]^-$  calculated by the BP86 method.

**Table S1.** Bond Lengths ( $\text{\AA}$ ) for  $[Pu^{IV}(HA)_3]^+$  Calculated by the B3LYP Method in Comparison with Experimental Data.

| Species             | Bond  | Gas phase | Expt.      |
|---------------------|-------|-----------|------------|
| $[Pu^{IV}(HA)_3]^+$ | Pu-O1 | 2.4074    | 2.3822(42) |
|                     | Pu-O2 | 2.3764    | 2.3727(44) |
|                     | Pu-O3 | 2.4089    | 2.4027(45) |
|                     | Pu-O4 | 2.3776    | 2.3765(48) |
|                     | Pu-O5 | 2.4132    | 2.3923(50) |
|                     | Pu-O6 | 2.3724    | 2.3593(57) |
|                     | Pu-N1 | 2.5199    | 2.4610(54) |
|                     | Pu-N2 | 2.5221    | 2.4741(58) |
|                     | Pu-N3 | 2.5193    | 2.4522(45) |

**Table S2.** Np-N and Np-O Average Bond Lengths ( $\text{\AA}$ ) for the Np(V, VI) Complexes with  $RAO^-$ ,  $RAc^-$  ( $R=C_{13}H_{26}$ ) by the B3LYP Method. <sup>a</sup>

| Species                       | Np-O(axial) | Np-O( $RAc^-$ ) | Np-O( $RAO^-$ ) | Np-N( $RAO^-$ ) |
|-------------------------------|-------------|-----------------|-----------------|-----------------|
| $[NpO_2(RAO)_4]^{n-}$         | 1.832/1.785 | —               | 2.509/2.318     | —               |
| $[NpO_2(RAO)_2(RAO/Ac)]^{n-}$ | 1.835/1.785 | 2.572/2.442     | 2.547/2.378     | 2.630/2.561     |
| $[NpO_2(RAO/Ac)_2]^{n-}$      | 1.840/1.780 | 2.544/2.391     | 2.421/2.294     | —/2.849         |
| $[NpO_2(RAc)_2(RAO/Ac)]^{n-}$ | 1.827/1.777 | 2.560/2.360     | 2.427/2.217     | —               |
| $[NpO_2(RAc)_4]^{n-}$         | 1.808/1.766 | 2.506/2.325     | —               | —               |

<sup>a</sup>.../... refers to the results for Np(V) and Np(VI) complexes, respectively.

**Table S3.** MBOs of Np-N and Np-O Bonds and Mulliken Charge Transfer ( $\Delta Q_{\text{Np}}$ ,  $e$ ) from Ligands to Actinide Ions for the Np(V) and Np(VI) Complexes by the B3LYP Method.<sup>a</sup>

| Species                                                      | Np-O (axial) | Np-O (RAc <sup>-</sup> ) | Np-O (RAO <sup>-</sup> ) | Np-N (RAO <sup>-</sup> ) | $\Delta Q_{\text{Np}}$ |
|--------------------------------------------------------------|--------------|--------------------------|--------------------------|--------------------------|------------------------|
| [NpO <sub>2</sub> (RAO) <sub>4</sub> ] <sup>n-</sup>         | 2.087/2.109  | —                        | 0.338/0.525              | —                        | 3.907/4.648            |
| [NpO <sub>2</sub> (RAO) <sub>2</sub> (RAO/Ac)] <sup>n-</sup> | 2.032/2.076  | 0.296/0.362              | 0.315/0.475              | 0.146/0.184              | 3.799/4.543            |
| [NpO <sub>2</sub> (RAO/Ac) <sub>2</sub> ] <sup>n-</sup>      | 1.966/2.083  | 0.316/0.375              | 0.413/0.595              | —/0.112                  | 3.838/4.570            |
| [NpO <sub>2</sub> (RAc) <sub>2</sub> (RAO/Ac)] <sup>n-</sup> | 2.014/2.093  | 0.297/0.401              | 0.434/0.726              | —                        | 3.793/4.552            |
| [NpO <sub>2</sub> (RAc) <sub>4</sub> ] <sup>n-</sup>         | 2.110/2.137  | 0.262/0.426              | —                        | —                        | 3.806/4.518            |

<sup>a</sup>.../... refers to the results for Np(V) and Np(VI) complexes, respectively.

**Table S4.** Contribution (%) of Metal Atoms and the O/N of Amidoximate Group to the Delocalized Canonical MOs for Complexes [An(NO<sub>3</sub>)(RAO)<sub>4</sub>]<sup>-</sup> at the B3LYP/6-311G(d, p)/RECP Level of Theory.

| Atoms                            | MO-192a  | MO-193a  | MO-194a  | MO-198a  |
|----------------------------------|----------|----------|----------|----------|
| Np                               | 5f:69.25 | 5f:43.66 | 5f:42.33 | 5f:35.24 |
|                                  | 6d:1.30  | 6d:0.71  | 6d:1.43  | —        |
| O(AO <sup>-</sup> )              | 2p:14.80 | 2p:23.53 | 2p:26.94 | 2p:29.95 |
| N(AO <sup>-</sup> )              | 2p:0.95  | 2p:8.82  | —        | —        |
| O(NO <sub>3</sub> <sup>-</sup> ) | —        | —        | —        | —        |
| Atoms                            | MO-193a  | MO-194a  | MO-195a  | MO-199a  |
| Pu                               | 5f:31.31 | 5f:9.52  | 5f:11.62 | 5f:8.61  |
|                                  | 6d:3.04  | 6d:2.62  | 6d:3.75  | —        |
| O(AO <sup>-</sup> )              | 2p:39.10 | 2p:32.85 | 2p:28.74 | 2p:39.31 |
| N(AO <sup>-</sup> )              | 2p:8.64  | 2p:9.19  | 2p:1.52  | —        |
| O(NO <sub>3</sub> <sup>-</sup> ) | —        | —        | —        | —        |



**Table S5.** The Composition and Contribution of An and O Atomic Orbitals to Metal-Ligand Bonds for the  $[\text{Np}(\text{NO}_3)(\text{RAO})_4]^-$  calculated by the BP86 method.

| Bonds                               | Bond Type | Np%   | O%    | Contribution of Np(%)              | Contribution of O(%) |
|-------------------------------------|-----------|-------|-------|------------------------------------|----------------------|
| Np <sub>107</sub> -O <sub>100</sub> | $\pi$     | 10.69 | 89.31 | 7s(2.45)7p(0.13)6d(47.70)5f(49.72) | 2s(21.92)2p(78.06)   |
| Np <sub>107</sub> -O <sub>101</sub> | $\sigma$  | 10.85 | 89.15 | 7s(3.93)7p(0.21)6d(61.49)5f(34.38) | 2s(29.21)2p(70.68)   |
| Np <sub>107</sub> -O <sub>101</sub> | $\pi$     | 5.84  | 94.16 | 7s(0.09)7p(0.31)6d(27.22)5f(72.38) | 2s(0.04)2p(99.82)    |
| Np <sub>107</sub> -O <sub>102</sub> | $\pi$     | 5.86  | 94.14 | 7s(0.01)7p(0.35)6d(29.38)5f(70.25) | 2s(0.14)2p(99.86)    |
| Np <sub>107</sub> -O <sub>103</sub> | $\sigma$  | 10.61 | 89.39 | 7s(4.36)7p(0.30)6d(49.34)5f(46.00) | 2s(30.16)2p(69.74)   |
| Np <sub>107</sub> -O <sub>103</sub> | $\pi$     | 5.74  | 94.26 | 7s(1.94)7p(0.38)6d(37.76)5f(59.92) | 2s(0.27)2p(99.61)    |

**Table S6.** The Composition and Contribution of An and O Atomic Orbitals to Metal-Ligand Bonds for the  $[\text{Np}(\text{NO}_3)(\text{RAc})_4]^-$  calculated by the BP86 method.

| Bonds                             | Bond Type | Np%  | O%    | Contribution of Np(%)               | Contribution of O(%) |
|-----------------------------------|-----------|------|-------|-------------------------------------|----------------------|
| Np <sub>94</sub> -O <sub>83</sub> | $\sigma$  | 7.79 | 92.21 | 7s(6.38)7p(1.68)6d(47.37)5f(44.58)  | 2s(21.91)2p(77.93)   |
| Np <sub>94</sub> -O <sub>84</sub> | $\sigma$  | 7.04 | 92.96 | 7s(9.36)7p(1.84)6d(24.88)5f(63.91)  | 2s(19.57)2p(80.25)   |
| Np <sub>94</sub> -O <sub>85</sub> | $\sigma$  | 7.95 | 92.05 | 7s(9.30)7p(0.55)6d(46.20)5f(43.95)  | 2s(23.06)2p(76.78)   |
| Np <sub>94</sub> -O <sub>86</sub> | $\sigma$  | 7.38 | 92.62 | 7s(11.11)7p(1.41)6d(38.08)5f(49.40) | 2s(18.96)2p(80.87)   |
| Np <sub>94</sub> -O <sub>87</sub> | $\sigma$  | 7.57 | 92.43 | 7s(8.18)7p(1.16)6d(29.95)5f(60.71)  | 2s(21.50)2p(78.33)   |
| Np <sub>94</sub> -O <sub>88</sub> | $\sigma$  | 7.50 | 92.50 | 7s(7.50)7p(1.56)6d(53.42)5f(37.52)  | 2s(20.60)2p(79.23)   |
| Np <sub>94</sub> -O <sub>89</sub> | $\sigma$  | 7.53 | 92.47 | 7s(12.23)7p(1.36)6d(73.58)5f(12.83) | 2s(21.82)2p(78.01)   |
| Np <sub>94</sub> -O <sub>90</sub> | $\sigma$  | 7.79 | 92.89 | 7s(11.04)7p(1.26)6d(40.64)5f(47.06) | 2s(20.51)2p(79.32)   |
| Np <sub>94</sub> -O <sub>91</sub> | $\sigma$  | 7.21 | 92.79 | 7s(11.50)7p(1.66)6d(26.29)5f(60.55) | 2s(26.59)2p(73.28)   |
| Np <sub>94</sub> -O <sub>93</sub> | $\sigma$  | 8.02 | 91.98 | 7s(9.97)7p(1.08)6d(49.40)5f(39.55)  | 2s(30.34)2p(69.54)   |

**Table S7.** The Composition and Contribution of An and O Atomic Orbitals to Metal-Ligand Bonds for the  $[\text{Np}(\text{NO}_3)(\text{RAO}/\text{Ac})_2]^-$  calculated by the BP86 method.

| Bonds                               | Bond Type | Np%       | O/N%  | Contribution of Np(%)               | Contribution of O/N(%) |
|-------------------------------------|-----------|-----------|-------|-------------------------------------|------------------------|
| Np <sub>101</sub> -O <sub>92</sub>  | $\sigma$  | 10.7<br>8 | 89.22 | 7s(6.17)7p(1.17)6d(44.30)5f(48.36)  | 2s(29.43)2p(70.44)     |
| Np <sub>101</sub> -O <sub>93</sub>  | $\pi$     | 5.96      | 94.04 | 7s(8.10)7p(7.92)6d(42.28)5f(41.70)  | 2s(16.96)2p(82.87)     |
| Np <sub>101</sub> -O <sub>94</sub>  | $\pi$     | 7.35      | 92.65 | 7s(11.34)7p(6.02)6d(44.99)5f(37.65) | 2s(22.26)2p(77.59)     |
| Np <sub>101</sub> -O <sub>95</sub>  | $\sigma$  | 10.9<br>2 | 89.08 | 7s(7.71)7p(0.46)6d(41.96)5f(49.87)  | 2s(30.84)2p(69.05)     |
| Np <sub>101</sub> -O <sub>95</sub>  | $\pi$     | 6.10      | 93.90 | 7s(0.23)7p(4.63)6d(42.55)5f(52.58)  | 2s(0.35)2p(99.50)      |
| Np <sub>101</sub> -O <sub>96</sub>  | $\sigma$  | 6.60      | 93.40 | 7s(11.83)7p(6.98)6d(36.30)5f(44.89) | 2s(19.61)2p(80.23)     |
| Np <sub>101</sub> -O <sub>97</sub>  | $\sigma$  | 6.46      | 93.54 | 7s(9.03)7p(8.75)6d(44.68)5f(37.54)  | 2s(18.89)2p(80.94)     |
| Np <sub>101</sub> -O <sub>99</sub>  | $\pi$     | 6.45      | 93.55 | 7s(10.53)7p(5.83)6d(43.98)5f(39.67) | 2s(23.43)2p(76.44)     |
| Np <sub>101</sub> -O <sub>100</sub> | $\sigma$  | 6.98      | 93.02 | 7s(11.09)7p(9.31)6d(41.49)5f(38.11) | 2s(28.33)2p(71.55)     |
| Np <sub>101</sub> -N <sub>87</sub>  | $\pi$     | 9.79      | 90.21 | 7s(10.99)7p(1.83)6d(44.83)5f(42.35) | 2s(40.53)2p(59.43)     |
| Np <sub>101</sub> -N <sub>89</sub>  | $\sigma$  | 7.74      | 92.26 | 7s(11.31)7p(4.72)6d(37.52)5f(46.46) | 2s(40.31)2p(59.64)     |

**Table S8.** The Averaged Values are Presented for the Np–N and Np–O Bond Critical Points (BCPs) of the Np(V) Complexes by the B3LYP Method.

| Species                                                   | Bonds                    | $\rho$ | $\nabla^2\rho$ | H          |
|-----------------------------------------------------------|--------------------------|--------|----------------|------------|
| [NpO <sub>2</sub> (RAc) <sub>4</sub> ] <sup>3-</sup>      | Np-O (axial)             | 0.135  | 0.321          | -0.2092005 |
|                                                           | Np-O (RAc <sup>-</sup> ) | 0.022  | 0.195          | 0.0016439  |
| [NpO <sub>2</sub> (RAO) <sub>4</sub> ] <sup>3-</sup>      | Np-O (axial)             | 0.127  | 0.337          | -0.1851091 |
|                                                           | Np-O (RAO <sup>-</sup> ) | 0.024  | 0.189          | -0.0005280 |
|                                                           | Np-N (RAO <sup>-</sup> ) | —      | —              | —          |
| [NpO <sub>2</sub> (RAO) <sub>3</sub> (RAc)] <sup>3-</sup> | Np-O (axial)             | 0.126  | 0.322          | -0.1814755 |
|                                                           | Np-O (RAc <sup>-</sup> ) | 0.019  | 0.160          | 0.0016236  |
|                                                           | Np-O (RAO <sup>-</sup> ) | 0.022  | 0.168          | -0.0001953 |
|                                                           | Np-N (RAO <sup>-</sup> ) | 0.018  | 0.145          | 0.0004947  |
| [NpO <sub>2</sub> (RAO/Ac) <sub>2</sub> ] <sup>3-</sup>   | Np-O (axial)             | 0.125  | 0.342          | -0.1778992 |
|                                                           | Np-O (RAc <sup>-</sup> ) | 0.021  | 0.175          | 0.0008711  |
|                                                           | Np-O (RAO <sup>-</sup> ) | 0.030  | 0.233          | -0.0027594 |
|                                                           | Np-N (RAO <sup>-</sup> ) | —      | —              | —          |
| [NpO <sub>2</sub> (RAO)(RAc) <sub>3</sub> ] <sup>3-</sup> | Np-O (axial)             | 0.129  | 0.316          | -0.1899827 |
|                                                           | Np-O (RAc <sup>-</sup> ) | 0.019  | 0.168          | 0.0017864  |
|                                                           | Np-O (RAO <sup>-</sup> ) | 0.028  | 0.226          | -0.0019836 |
|                                                           | Np-N (RAO <sup>-</sup> ) | —      | —              | —          |

**Table S9.** The Averaged Values are Presented for the Np–N and Np–O Bond Critical Points (BCPs) of the Np(VI) Complexes by the B3LYP Method.

| Species                                                   | Bonds                    | $\rho$ | $\nabla^2\rho$ | H          |
|-----------------------------------------------------------|--------------------------|--------|----------------|------------|
| [NpO <sub>2</sub> (RAc) <sub>4</sub> ] <sup>2-</sup>      | Np-O (axial)             | 0.150  | 0.323          | -0.2591710 |
|                                                           | Np-O (RAc <sup>-</sup> ) | 0.035  | 0.287          | -0.0048011 |
| [NpO <sub>2</sub> (RAO) <sub>4</sub> ] <sup>2-</sup>      | Np-O (axial)             | 0.143  | 0.333          | -0.2346091 |
|                                                           | Np-O (RAO <sup>-</sup> ) | 0.038  | 0.281          | -0.0078476 |
|                                                           | Np-N (RAO <sup>-</sup> ) | —      | —              | —          |
| [NpO <sub>2</sub> (RAO) <sub>3</sub> (RAc)] <sup>2-</sup> | Np-O (axial)             | 0.143  | 0.329          | -0.2347635 |
|                                                           | Np-O (RAc <sup>-</sup> ) | 0.027  | 0.218          | -0.0007618 |
|                                                           | Np-O (RAO <sup>-</sup> ) | 0.034  | 0.236          | -0.0061599 |
|                                                           | Np-N (RAO <sup>-</sup> ) | 0.024  | 0.194          | -0.0023187 |
| [NpO <sub>2</sub> (RAO/Ac) <sub>2</sub> ] <sup>2-</sup>   | Np-O (axial)             | 0.145  | 0.328          | -0.2412785 |
|                                                           | Np-O (RAc <sup>-</sup> ) | 0.030  | 0.247          | -0.0018854 |
|                                                           | Np-O (RAO <sup>-</sup> ) | 0.042  | 0.287          | -0.0125506 |
|                                                           | Np-N (RAO <sup>-</sup> ) | —      | —              | —          |
| [NpO <sub>2</sub> (RAO)(RAc) <sub>3</sub> ] <sup>2-</sup> | Np-O (axial)             | 0.146  | 0.326          | -0.2454565 |
|                                                           | Np-O (RAc <sup>-</sup> ) | 0.032  | 0.268          | -0.0026094 |
|                                                           | Np-O (RAO <sup>-</sup> ) | 0.049  | 0.344          | -0.0179370 |
|                                                           | Np-N (RAO <sup>-</sup> ) | —      | —              | —          |

**Table S10.** The Gibbs free energy changes ( $\Delta G$ , kcal/mol) and the differences in  $\Delta G$  (denoted as  $\Delta\Delta G$ , kcal/mol) for the Reactions of Np(IV) and Pu(IV) Complexes with RAO<sup>-</sup>, RAc<sup>-</sup> (R=C<sub>13</sub>H<sub>26</sub>) in the Octanol Solution. <sup>a</sup>

| Reactions                                                                                                                                                                       | $\Delta G$    | $\Delta\Delta G$ |
|---------------------------------------------------------------------------------------------------------------------------------------------------------------------------------|---------------|------------------|
| [An(H <sub>2</sub> O) <sub>9</sub> ] <sup>4+</sup> + 2[RAO] <sub>2</sub> <sup>2-</sup> → An(RAO) <sub>4</sub> + 9H <sub>2</sub> O                                               | -236.7/-243.4 | -6.7             |
| [An(H <sub>2</sub> O) <sub>9</sub> ] <sup>4+</sup> + [RAO] <sub>2</sub> <sup>2-</sup> + [RAO/Ac] <sub>2</sub> <sup>2-</sup> → An(RAO) <sub>2</sub> (RAO/Ac) + 9H <sub>2</sub> O | -212.0/-221.7 | -9.7             |
| [An(H <sub>2</sub> O) <sub>9</sub> ] <sup>4+</sup> + 2[RAO/Ac] <sub>2</sub> <sup>2-</sup> → An(RAO/Ac) <sub>2</sub> + 9H <sub>2</sub> O                                         | -193.9/-194.8 | -0.9             |
| [An(H <sub>2</sub> O) <sub>9</sub> ] <sup>4+</sup> + [RAO/Ac] <sub>2</sub> <sup>2-</sup> + [RAc] <sub>2</sub> <sup>2-</sup> → An(RAc) <sub>2</sub> (RAO/Ac) + 9H <sub>2</sub> O | -152.5/-163.1 | -8.8             |
| [An(H <sub>2</sub> O) <sub>9</sub> ] <sup>4+</sup> + 2[RAc] <sub>2</sub> <sup>2-</sup> → An(RAc) <sub>4</sub> + 9H <sub>2</sub> O                                               | -144.8/-150.6 | -5.8             |

<sup>a</sup>.../... refers to the results for Np(IV) and Pu(IV) complexes, respectively.

**Table S11.** The Gibbs free energy changes ( $\Delta G$ , kcal/mol) and the differences in  $\Delta G$  (denoted as  $\Delta\Delta G$ , kcal/mol) for the Reactions of Np(IV) and Pu(IV) Complexes with  $\text{RAO}^-$ ,  $\text{RAc}^-$  ( $\text{R}=\text{C}_{13}\text{H}_{26}$ ), and  $\text{NO}_3^-$  in the Octanol Solution. <sup>a</sup>

| Reactions                                                                                                                                                                                                       | $\Delta G$    | $\Delta\Delta G$ |
|-----------------------------------------------------------------------------------------------------------------------------------------------------------------------------------------------------------------|---------------|------------------|
| $[\text{An}(\text{H}_2\text{O})_9]^{4+} + 2[\text{RAO}]_2^{2-} + \text{NO}_3^- \rightarrow [\text{An}(\text{NO}_3)(\text{RAO})_4]^- + 9\text{H}_2\text{O}$                                                      | -226.5/-231.5 | -4.9             |
| $[\text{An}(\text{H}_2\text{O})_9]^{4+} + [\text{RAO}]_2^{2-} + [\text{RAO}/\text{Ac}]_2^{2-} + \text{NO}_3^- \rightarrow [\text{An}(\text{NO}_3)(\text{RAO})_2(\text{RAO}/\text{Ac})]^- + 9\text{H}_2\text{O}$ | -217.8/-225.5 | -7.7             |
| $[\text{An}(\text{H}_2\text{O})_9]^{4+} + 2[\text{RAO}/\text{Ac}]_2^{2-} + \text{NO}_3^- \rightarrow [\text{An}(\text{NO}_3)(\text{RAO}/\text{Ac})_2]^- + 9\text{H}_2\text{O}$                                  | -200.5/-207.1 | -6.6             |
| $[\text{An}(\text{H}_2\text{O})_9]^{4+} + [\text{RAO}/\text{Ac}]_2^{2-} + [\text{RAc}]_2^{2-} + \text{NO}_3^- \rightarrow [\text{An}(\text{NO}_3)(\text{RAc})_2(\text{RAO}/\text{Ac})]^- + 9\text{H}_2\text{O}$ | -163.1/-170.2 | -7.1             |
| $[\text{An}(\text{H}_2\text{O})_9]^{4+} + 2[\text{RAc}]_2^{2-} + \text{NO}_3^- \rightarrow [\text{An}(\text{NO}_3)(\text{RAc})_4]^- + 9\text{H}_2\text{O}$                                                      | -151.7/-156.3 | -4.6             |

<sup>a</sup>.../... refers to the results for Np(IV) and Pu(IV) complexes, respectively.

**Table S12.** The Gibbs free energy changes ( $\Delta G$ , kcal/mol) and the differences in  $\Delta G$  (denoted as  $\Delta\Delta G$ , kcal/mol) for the Reactions of Np (V, VI) Complexes with  $\text{RAO}^-$  and  $\text{RAc}^-$  in the Octanol Solution.

| Reactions                                                                                                                                                                                   | $\Delta G$ | $\Delta\Delta G$ |
|---------------------------------------------------------------------------------------------------------------------------------------------------------------------------------------------|------------|------------------|
| $[\text{NpO}_2(\text{H}_2\text{O})_5]^+ + 2[\text{RAO}]_2^{2-} \rightarrow [\text{NpO}_2(\text{RAO})_4]^{3-} + 5\text{H}_2\text{O}$                                                         | -75.4      | -83.6            |
| $[\text{NpO}_2(\text{H}_2\text{O})_5]^{2+} + 2[\text{RAO}]_2^{2-} \rightarrow [\text{NpO}_2(\text{RAO})_4]^{2-} + 5\text{H}_2\text{O}$                                                      | -159.0     |                  |
| $[\text{NpO}_2(\text{H}_2\text{O})_5]^+ + [\text{RAO}]_2^{2-} + [\text{RAO}/\text{Ac}]_2^{2-} \rightarrow [\text{NpO}_2(\text{RAO})_2(\text{RAO}/\text{Ac})]^{3-} + 5\text{H}_2\text{O}$    | -57.6      | -77.8            |
| $[\text{NpO}_2(\text{H}_2\text{O})_5]^{2+} + [\text{RAO}]_2^{2-} + [\text{RAO}/\text{Ac}]_2^{2-} \rightarrow [\text{NpO}_2(\text{RAO})_2(\text{RAO}/\text{Ac})]^{2-} + 5\text{H}_2\text{O}$ | -135.4     |                  |
| $[\text{NpO}_2(\text{H}_2\text{O})_5]^+ + 2[\text{RAO}/\text{Ac}]_2^{2-} \rightarrow [\text{NpO}_2(\text{RAO}/\text{Ac})_2]^{3-} + 5\text{H}_2\text{O}$                                     | -64.7      | -55.2            |
| $[\text{NpO}_2(\text{H}_2\text{O})_5]^{2+} + 2[\text{RAO}/\text{Ac}]_2^{2-} \rightarrow [\text{NpO}_2(\text{RAO}/\text{Ac})_2]^{2-} + 5\text{H}_2\text{O}$                                  | -119.9     |                  |
| $[\text{NpO}_2(\text{H}_2\text{O})_5]^+ + [\text{RAO}/\text{Ac}]_2^{2-} + [\text{RAc}]_2^{2-} \rightarrow [\text{NpO}_2(\text{RAc})_2(\text{RAO}/\text{Ac})]^{3-} + 5\text{H}_2\text{O}$    | -40.3      | -67.5            |
| $[\text{NpO}_2(\text{H}_2\text{O})_5]^{2+} + [\text{RAO}/\text{Ac}]_2^{2-} + [\text{RAc}]_2^{2-} \rightarrow [\text{NpO}_2(\text{RAc})_2(\text{RAO}/\text{Ac})]^{2-} + 5\text{H}_2\text{O}$ | -107.8     |                  |
| $[\text{NpO}_2(\text{H}_2\text{O})_5]^+ + 2[\text{RAc}]_2^{2-} \rightarrow [\text{NpO}_2(\text{RAc})_4]^{3-} + 5\text{H}_2\text{O}$                                                         | -43.3      | -49.9            |
| $[\text{NpO}_2(\text{H}_2\text{O})_5]^{2+} + 2[\text{RAc}]_2^{2-} \rightarrow [\text{NpO}_2(\text{RAc})_4]^{2-} + 5\text{H}_2\text{O}$                                                      | -93.2      |                  |

**Table S13.** The Gibbs free energy changes ( $\Delta G$ , kcal/mol) and the differences in  $\Delta G$  (denoted as  $\Delta\Delta G$ , kcal/mol) for the reactions of Np(IV) and Pu(IV) protonated complexes with  $\text{RAO}^-$ ,  $\text{RAc}^-$  ( $\text{R}=\text{C}_{13}\text{H}_{26}$ ) in the octanol solution.<sup>a,b</sup>

| Reactions                                                                                                                                                                                                     | $\Delta G$ | $\Delta\Delta G$ |
|---------------------------------------------------------------------------------------------------------------------------------------------------------------------------------------------------------------|------------|------------------|
| $[\text{An}(\text{H}_2\text{O})_9]^{4+} + 2[\text{RHAO}/\text{HAO}] \rightarrow [\text{An}(\text{RHAO}/\text{AO})_2]^{2+} + 9\text{H}_2\text{O} + 2\text{H}^+$                                                | -6.4/-8.9  | -2.5             |
| $[\text{An}(\text{H}_2\text{O})_9]^{4+} + 2[\text{RHAO}/\text{HAc}] \rightarrow [\text{An}(\text{RHAO}/\text{Ac})_2]^{2+} + 9\text{H}_2\text{O} + 2\text{H}^+$                                                | 5.0/2.7    | -2.3             |
| $[\text{An}(\text{H}_2\text{O})_9]^{4+} + 2[\text{RAO}/\text{HAc}] \rightarrow [\text{An}(\text{RAO}/\text{HAc})_2]^{2+} + 9\text{H}_2\text{O} + 2\text{H}^+$                                                 | 11.5/2.0   | -9.5             |
| $[\text{An}(\text{H}_2\text{O})_9]^{4+} + [\text{RHAO}/\text{HAc}] + [\text{RHAO}/\text{HAO}] \rightarrow [\text{An}(\text{RAO}/\text{HAc})(\text{RHAO}/\text{AO})]^{2+} + 9\text{H}_2\text{O} + 2\text{H}^+$ | 5.9/-1.5   | -7.4             |
| $[\text{An}(\text{H}_2\text{O})_9]^{4+} + [\text{RHAO}/\text{HAO}] + [\text{RHAO}/\text{HAc}] \rightarrow [\text{An}(\text{RHAO}/\text{AO})(\text{RHAO}/\text{Ac})]^{2+} + 9\text{H}_2\text{O} + 2\text{H}^+$ | -2.1/-9.5  | -7.4             |
| $[\text{An}(\text{H}_2\text{O})_9]^{4+} + [\text{RHAO}/\text{HAc}] + [\text{RHAc}/\text{HAc}] \rightarrow [\text{An}(\text{RHAO}/\text{Ac})(\text{RHAc}/\text{Ac})]^{2+} + 9\text{H}_2\text{O} + 2\text{H}^+$ | 15.3/8.1   | -7.2             |
| $[\text{An}(\text{H}_2\text{O})_9]^{4+} + [\text{RAO}/\text{HAc}] + [\text{RHAc}/\text{HAc}] \rightarrow [\text{An}(\text{RAO}/\text{HAc})(\text{RHAc}/\text{Ac})]^{2+} + 9\text{H}_2\text{O} + 2\text{H}^+$  | 27.6/16.7  | -10.9            |
| $[\text{An}(\text{H}_2\text{O})_9]^{4+} + 2[\text{RHAc}/\text{HAc}] \rightarrow [\text{An}(\text{RHAc}/\text{Ac})_2]^{2+} + 9\text{H}_2\text{O} + 2\text{H}^+$                                                | 28.8/25.4  | -3.4             |

<sup>a</sup>.../... refers to the results for Np(IV) and Pu(IV) complexes, respectively.

<sup>b</sup> The experimental free energy of solvation (-263.982 kcal/mol) was adopted for  $\text{H}^+$ .
